1 **The successful invasion of the European earwig across North America**  
2 **reflects adaptations to thermal regimes but not mean temperatures.**

3 *Running title:* Climate adaptation in earwigs

4 Jean-Claude Tourneur<sup>1</sup>, Joël Meunier<sup>2\*</sup>

5 <sup>1</sup> Département des Sciences biologiques, Université du Québec à Montréal 141. Avenue du  
6 Président-Kennedy, Montréal, Québec, H2X 1Y4, Canada.

7 Email: [jc.tourneur@nb.sympatico.ca](mailto:jc.tourneur@nb.sympatico.ca)

8 <sup>2</sup> Institut de Recherche sur la Biologie de l’Insecte (IRBI), UMR 7261, CNRS, University of  
9 Tours, Tours, France.

10 Email: [joel.meunier@univ-tours.fr](mailto:joel.meunier@univ-tours.fr) | ORCID: 0000-0001-6893-2064

11 \*Corresponding author.

## ABSTRACT

12 Understanding the mechanisms by which an introduced species adapt to newly encountered  
13 habitats is a major question in ecology. A key method to address this question is to collect  
14 data on introduced species that have successfully invaded a broad diversity of novel  
15 environments, and analyze how their life-history traits changed with these new constraints.  
16 Here, we present and analyze such a unique data set in the European earwig *Forficula*  
17 *auricularia* L, an insect that invaded North America during the last century. We conducted a  
18 common garden experiment, in which we measured 13 life-history traits in 4158 individuals  
19 from 19 populations across North America. Our results demonstrate that the successful  
20 invasion of this species came with changes in 10 of their life-history traits in response to  
21 thermal regimes (winter-summer and autumn-spring temperatures), but with no change in  
22 response to the overall mean temperatures of the invaded locations. Importantly, we show  
23 that some of these changes are by-products of novel thermal regimes, whereas others reflect  
24 adaptive strategies of females to these constraints. Overall, our findings reveal the importance  
25 of thermal regimes over mean temperatures in climate adaptation, and emphasize that  
26 studying adaptive capabilities is crucial to predict the limits of biological invasions.

27 **Keywords:** Temperature, Adaptation, Reproductive strategy, Climate change, Dermaptera

## INTRODUCTION

28 Over the last centuries, the dramatic increase in human trade and transit has facilitated the  
29 transport of a large number of animal and plant species out of their native area (Hulme 2009).  
30 Although most of these species rapidly disappeared from their novel environment, a few of  
31 them remained, adapted and became invasive (Jeschke and Strayer 2005). These biological  
32 invasions are often considered a major threat for the maintenance of native biodiversity, and  
33 have profound impacts on agriculture, economy and human health (Bradshaw et al. 2016).  
34 Understanding what triggers and promotes biological invasions is therefore a major, ongoing  
35 and challenging question in population biology, ecology and evolution (Hill et al. 2016;  
36 Courchamp et al. 2017; Hill et al. 2019).

37 A key method to better understand the determinants of biological invasions is to  
38 collect and analyze large biological data sets on introduced species that have successfully  
39 invaded novel environments exhibiting a broad diversity of constraints (Bellard et al. 2016).  
40 The European earwig *Forficula auricularia* L. is one of these species. This insect exhibits a  
41 broad native range extending across Europe, Asia and northern Africa (Lamb and Wellington  
42 1975) from which it has been introduced in Australia, New Zealand, East Africa, East Indies,  
43 Tasmania and America (Frank 1918; Guillet et al. 2000; Quarrell et al. 2018; Hill et al. 2019).  
44 Its presence in North America was first reported on the Pacific coast in Seattle (WA) in 1907  
45 (Fulton 1924), on the Atlantic coast in Newport (RI) in 1911 (Jones 1917) and in Vancouver  
46 (BC) in 1919 (Treherne 1923). From these introductory foci, *F. auricularia* first spread along  
47 the coasts to cover areas ranging from British-Columbia to California and from  
48 Newfoundland to South Carolina, and then reached the interior of the continent in both  
49 United States of America (Crumb et al. 1941) and Canada (Wilson 1971; Cantrall 1972;  
50 Tourneur 2017). Whereas the European earwig is often considered a pest control in its native  
51 range (Moerkens et al. 2012), it has been described as an agricultural pest and a nuisance of

52 human habitations in its newly colonized area (Crumb et al. 1941; Lamb and Wellington  
53 1975; Walker et al. 1993; Quarrell et al. 2016; Quarrell et al. 2018). Moreover, this species  
54 has been suggested to have partly drove the decline of threatened and endangered  
55 invertebrates in America, such as the El Segundo Blue Butterfly *Euphilotes bernardino allyni*  
56 and the Valley Elder-berry Longhorn Beetle *Desmocerus californicus dimorphus* (Quarrell et  
57 al. 2018).

58         Because the univoltine life cycle of this species lasts up to 2 years and encompasses  
59 all seasons and temperatures (Lamb 1976), it has long been thought that mean temperatures  
60 and thermal regimes (defined as variation of temperatures between seasons or months) could  
61 be major constraints in the success of *F. auricularia* invasions (Vancassel 1984; Hill et al.  
62 2019). However, it remains unclear whether and how this species can mitigate such  
63 constraints by adapting its life-cycle and life-history traits (Ratz et al. 2016; Tourneur 2018).  
64 The life cycle of this species generally starts with the emergence of new adults in late spring  
65 to early July (depending on the populations). These adults form groups of up to several  
66 hundred individuals, in which both males and females typically mate with several partners  
67 (Weiß et al. 2014; Sandrin et al. 2015; Tourneur 2017). Females then burrow in the ground  
68 from mid fall to early winter and build a nest where they lay their first clutch of eggs. After  
69 egg laying, females stop their foraging activity and provide extensive forms of egg care until  
70 hatching (Gingras and Tourneur 2001; Boos et al. 2014; Koch and Meunier 2014; Thesing et  
71 al. 2015; Diehl and Meunier 2018; Körner et al. 2018). The eggs of this first clutch hatch in  
72 spring and mothers remain with their newly hatched larvae for several weeks to provide them  
73 with multiple forms of care (Gingras and Tourneur 2001; Kölliker et al. 2015; Kramer et al.  
74 2015). A few weeks later, the family unit is naturally disrupted. While larvae continue their  
75 development to adults in new social groups, some females produce a second clutch of eggs  
76 (i.e. iteroparous as compared to semelparous females), which will also receive pre- and post-

77 hatching care and will hatch in late spring (Lamb and Wellington 1975; Meunier et al. 2012;  
78 Ratz et al. 2016). All females generally die during the following summer (Albouy and  
79 Caussanel 1990).

80 In this study, we used a common garden experiment to investigate whether and how  
81 *F. auricularia* individuals altered their life history traits in response to the thermal constraints  
82 encountered during their North American invasion. From 1988 to 1995, we field-sampled  
83 individuals originating from 19 populations located from the East to the West coasts,  
84 maintained them under standard conditions and measured the properties of the 1<sup>st</sup> and 2<sup>nd</sup>  
85 clutches produced by each female in terms of egg laying date, egg number, egg development  
86 time and number of newly hatched larvae. We also recorded the reproductive strategy of the  
87 females (iteroparity versus semelparity), their reproductive outcome (total number of eggs  
88 and larvae produced over lifetime), as well as the longevity of the field-sampled males and  
89 females. If *F. auricularia* individuals adapted their life-cycle and life-history traits to the  
90 mean temperatures and/or thermal regimes of their populations of origin, we predict these  
91 traits to covary with the overall mean temperatures and/or variation in seasonal temperatures  
92 of their population. Conversely, if earwig life-history traits are independent to their previous  
93 thermal environments (i.e. no adaptation) and/or are plastic to their current thermal  
94 environment, we predict no apparent association between the traits measured in our field-  
95 sampled individuals and the thermal regimes of their populations of origins.

## MATERIAL AND METHODS

### 96 Earwig sampling and laboratory rearing

97 A total of 4158 *F. auricularia* individuals were collected over 7 years among 19 natural  
98 populations located across North America (Figure 1, Table 1). These individuals were

99 collected as larvae or adults using wooden traps (Tourneur 2018) between July and August,  
100 and were immediately setup in glass containers (Mason Jars Company, Erie, Pennsylvania,  
101 United States of America) in groups of 20 to 30 individuals. These containers received two  
102 sheets of creased toilet paper as resting places for earwigs, and were then transported to our  
103 laboratory in Montreal, Canada. Upon their arrival, each container was maintained under a  
104 standard climate condition (natural temperature and light-cycle of Montreal). During their  
105 transport and laboratory maintenance, containers received an *ad libitum* amount of carrots  
106 and pollen as a food source for earwigs, and were supplied with water by means of a cotton  
107 pad regularly soaked in water. This experimental setup allowed earwigs to continue their  
108 development, while performing non-controlled mating and expressing social interactions  
109 (Weiß et al. 2014; Sandrin et al. 2015; Kohlmeier et al. 2016; Körner et al. 2018). Two to  
110 three months later (between the 7<sup>th</sup> and the 19<sup>th</sup> day of October of each year), we used these  
111 individuals to set up 2079 mating pairs (from 17 to 356 pairs per population, see Table 1), in  
112 which we subsequently measured 13 life-history traits (see below). We maintained each of  
113 these pairs at  $10 \pm 1$  °C in a Petri dish (diameter 10 cm) grounded with a thin layer of moist  
114 sand, and in which food was changed and substrate humidified once a week. Food was  
115 removed at egg laying to mimic the natural end of earwigs' foraging activity (Kölliker 2007).  
116 At egg hatching, we discarded all newly emerged larvae from the experiments to trigger a  
117 novel ovarian cycle in the mothers and allow their production of a subsequent clutch  
118 (Vancassel and Foraste 1980; Meunier et al. 2012). We then maintained these pairs under the  
119 rearing conditions described above until our experiment ended, i.e. either one year after the  
120 beginning of our laboratory setup or at the death of the adult males and females. Overall,  
121 3927 of the 4158 (94.4%) tested individuals died within the year following the beginning of  
122 our experiments, a value in line with previous data on *F. auricularia* lifespan (Albouy and  
123 Caussanel 1990). Note that recent studies revealed that *F. auricularia* L. encompasses two

124 genetic subspecies which do not coexist within populations (Wirth et al. 1998; Tourneur  
125 2018; Quarrell et al. 2018). Although these subspecies were not taken into account in our  
126 analyses (our data were collected before the publication of these genetic analyses), the  
127 homogeneous distribution of the life history traits measured across populations (Figures 2 to  
128 4) suggests an absence of species-specific values regarding these measurements. The  
129 potential co-occurrence of the two subspecies in our data set is thus unlikely to bias our study  
130 and its main conclusions.

### 131 **Measurements of the life-history traits**

132 For each mating pair, we measured 13 life-history traits encompassing the properties of the  
133 resulting 1<sup>st</sup> and 2<sup>nd</sup> clutches (when present), the reproductive strategy and reproductive  
134 outcomes of each female, as well as the longevity of both field-sampled males and females.  
135 These properties were obtained by recording the date of egg production, counting the number  
136 of eggs produced, calculating the duration of egg development until hatching (in days) and  
137 finally counting the number of larvae at egg hatching in both 1<sup>st</sup> and 2<sup>nd</sup> clutches (when  
138 present). The reproductive strategies and outcomes of females were obtained by recording  
139 whether females were semelparous or iteroparous (i.e. produced one or two clutches in their  
140 lifetime, respectively), and by counting the total number of eggs and larvae produced per  
141 female during their lifetime. Finally, we measured adult's longevity by counting the number  
142 of days each male and female survived after October 1<sup>st</sup> of the year of field sampling. Note  
143 that 8.1% and 5.4% females from Santa Cruz and Asheville, respectively, produced a third  
144 clutch. This third clutch was not considered in the present study, as our experiment ended  
145 before their hatching.

### 146 **Extraction of mean temperatures and thermal regimes of each population**

147 We extracted the mean monthly temperature of the 19 studied populations using their GPS  
148 coordinates (Table 1) and the Worldclim database v2.0 (<http://www.worldclim.org/>) with a  
149 spatial resolution of 30 seconds. These mean temperatures were calculated over 30 years,  
150 from 1970 to 2000. To reduce dimensionality of co-varying temperatures in our data set and  
151 to characterize the thermal regimes of each population, we then conducted a Principal  
152 Component Analysis (PCA; an analysis without *a priori*) on the set of 12 mean monthly  
153 temperatures per population (Table S1). This analysis provided us with 12 orthogonal  
154 principal components (PCs), out of which we retained the first three PCs (total variance  
155 explained = 98.6%, Table 2). The first components (PC1) was positively loaded by almost all  
156 monthly temperatures, therefore positively reflecting the overall mean temperature of a  
157 population. The second component (PC2) revealed a trade-off between the mean temperature  
158 of February, and the mean temperatures of June, July, and August. In particular, high values  
159 of PC2 reflected populations with cold February (winter) and warm summer, whereas small  
160 values of PC2 reflected populations with warm February (winter) and cold summer. Finally,  
161 the third component (PC3) showed a trade-off between October and November on one hand,  
162 and April and May on the other hand. High values of PC3 therefore characterized populations  
163 with cold autumn and warm spring, whereas small values of PC3 reflected populations with  
164 warm autumn and cold spring.

### 165 **Statistical analyses**

166 To test whether *F. auricularia* adapt their life-cycle and life-history traits to North American  
167 thermal regimes, we conducted a series of 12 general linear models (LM in R) and one  
168 generalized linear model (GLM in R) – see Table 3. In the 12 LMs, the three selected PCs  
169 and their interactions were entered as explanatory variables (PC1, PC2 and PC3), whereas the  
170 response variable was either egg laying date, egg number, egg development time and larvae  
171 number for the 1<sup>st</sup> or 2<sup>nd</sup> clutches (a total of 8 LMs), the total number of eggs or larvae



172 produced, or the longevity of males or females. Note that both egg laying date and adult  
173 longevity were calculated using October 1<sup>st</sup> as day 0. In the GLM, the response variable was  
174 the ratio of iteroparous females per population, which was entered using the command *cbind*  
175 in R and fitted to a binomial error distribution corrected for overdispersion. All statistical  
176 models were based on the mean value of each response variable per population. They were  
177 also checked for homoscedasticity and residuals normality, as well as simplified stepwise by  
178 removing all non-significant interaction terms. To correct for inflated type-I errors due to  
179 multiple testing, all *P*-values were adjusted using False Discovery Rate (FDR) correction  
180 (Benjamini and Hochberg 1995). All analyses were conducted using the software R v3.5.1  
181 loaded with the packages *raster*, *FactoMineR*, *rsq* and *rcompanion*.

## RESULTS

182 The 19 studied populations greatly varied in their mean temperatures and thermal regimes  
183 (Table S1), as well as in the mean values of the 13 traits measured in their sampled  
184 individuals (Figures 2 to 4; Tables S2 to S4). Mean monthly temperatures overall ranged  
185 from 22.9°C (July in Saluda) to -10.1°C (January in Montreal), while thermal amplitudes  
186 over a year ranged from 30.7°C (Montreal) to 7.9°C (Santa Cruz). For the traits measured in  
187 the 1<sup>st</sup> clutches, the mean dates of egg production ranged from 47.8 to 132.6 days after the 1<sup>st</sup>  
188 of October, the mean number of eggs per clutch from 23.2 to 66.0, the mean egg development  
189 time from 42.2 to 71.4 days and the mean number of larvae per clutch from 11.6 to 44.8. For  
190 the 2<sup>nd</sup> clutches, the mean dates of egg production ranged from 142.0 to 248.2 days after the  
191 1<sup>st</sup> of October, the mean number of eggs from 14.0 to 38.4, the mean egg development time  
192 from 10.0 to 63.7 days and the mean number of larvae from 0 to 17.7. Finally, the total  
193 number of eggs produced ranged from 28.1 to 83.4, the total number of larvae produced from  
194 13.0 to 46.3, the proportion of iteroparous females from 0 to 70.8%, the longevity of males

195 from 82.0 to 299.8 days after the 1<sup>st</sup> of October and the longevity of females from 146.0 to  
196 322.5 days after the 1<sup>st</sup> of October.

197 Of the 13 measured traits, 10 varied together with the thermal regimes of the  
198 population of origin (Table 3). Five of these 10 traits were exclusively associated with PC2  
199 (February-summer temperatures), two traits were exclusively associated with PC3 (autumn-  
200 spring temperatures), and three traits were associated with both PC2 and PC3. By contrast, no  
201 traits were associated with PC1 (overall mean temperatures). The associations with PC2  
202 revealed that populations with cold February and warm summers (high PC2 values) had  
203 females that produced their 1<sup>st</sup> clutch of eggs earlier and these eggs had longer development  
204 time compared to populations exhibiting warm February and cold summers (low PC2 values,  
205 Figure 2). Similarly, females from the former populations were less likely to produce a  
206 second clutch (i.e. to be iteroparous, Figure 3) and when they did so, their 2<sup>nd</sup> clutches eggs  
207 were less numerous (Figure 3) and showed longer development time (Figure 3). Moreover,  
208 females and males from populations with cold February and warm summers lived less long  
209 compared to adults from warm February and cold summers (Figure 4). On the other hand, the  
210 effects of PC3 reveal that populations exhibiting cold autumn and warm spring (high PC3  
211 values) had females that produced their 1<sup>st</sup> clutch of eggs later in the season and these eggs  
212 were less numerous compared to females from populations with warm autumn and cold  
213 spring (low PC3 values, Figure 2). Females from the former populations also had 2<sup>nd</sup> clutch  
214 eggs that exhibited a shorter developmental time (Figure 3), they produced an overall lower  
215 number of eggs (Figure 4) and had males with a longer longevity (Figure 4). By contrast, the  
216 number of 1<sup>st</sup> clutch larvae, as well as their total number and the dates of 2<sup>nd</sup> clutch egg  
217 laying were independent of PC1, PC2 and PC3 (Figures 2, 3 and 4; Table 3).

## DISCUSSION

218 Shedding light on how species successfully adapt to novel environmental constraints is of  
219 major importance to improve our general understanding of the mechanisms underlying  
220 biological invasions, as well as on the general ecology of animal adaptations. In this study,  
221 we demonstrate that the successful invasion of the European earwig across North America  
222 came with multiple changes in their life-history traits in response to the thermal regimes (sets  
223 of winter-summer and autumn-spring temperatures), but not to the overall mean temperature  
224 of the invaded populations. In particular, our 7-years data from 19 populations revealed that  
225 females changed their timing of first reproduction, their reproductive strategy and investment  
226 into egg production when facing different thermal regimes, while both males and females  
227 longevities varied accordingly. By contrast, we found no association between thermal  
228 regimes and both the timing of second reproduction and the total number of larvae produced  
229 per female.

230 We showed that females produced their first clutch of eggs earlier when they came  
231 from populations facing warm summers and/or warm autumns (PC2 and PC3, respectively),  
232 and were less likely to produce a second clutch in populations with cold February. The effect  
233 of warm temperatures on egg laying date is not surprising: adult earwigs typically develop  
234 and mate during summer and autumn, so that warm temperatures during these seasons can  
235 accelerate their reproductive physiology (as shown in other insect species, Singh et al., 2018)  
236 and thus accelerate egg laying (Tourneur 2018). Similarly, cold Februaries may slow down  
237 the development of 1<sup>st</sup> clutch eggs and thus extend the corresponding period of egg care.  
238 This, in turn, may inhibit females physiological transformation to produce a second clutch  
239 (Vancassel 1984; Tourneur 2018). This scenario is in line with previous results showing that  
240 cold winters increase the duration of egg development time in *F. auricularia* (Gingras and  
241 Tourneur 2001; Körner et al. 2018). It is also in line with other results demonstrating that  
242 tending eggs inhibits vitellogenic activity and the production of juvenile hormone in the

243 earwig *Labidura riparia* Pallas, two parameters required to activate ovary development and  
244 allow egg production (Vancassel et al. 1984). Overall, these results suggest that changes in  
245 the timing of first reproduction and females' reproductive strategy did not evolve to better  
246 cope with novel thermal constraints, but instead that they are simple by-product of these  
247 constraints. This reveals that *F. auricularia* has the capability to deal with a broad range of  
248 thermal constraints (at least the range found across North America), and emphasizes that such  
249 constraints are unlikely to preclude its spread to novel populations.

250         Interestingly, our data show that thermal regimes are associated with lifetime egg  
251 production, but not with lifetime larvae production. In particular, the total number of eggs  
252 produced per female decreased together with autumn temperatures, whereas this association  
253 vanished with larvae number. This apparent discrepancy suggests that females from  
254 populations with the warmest autumns lost a larger number of eggs during egg development.  
255 A first explanation could be that these females were less efficient in egg care, a process that is  
256 essential to ensure egg development until hatching in earwigs (Boos et al. 2014; Van Meyel  
257 et al. 2019). Whereas this should be tested in future studies, previous results suggest that it  
258 could be unlikely, as maternal investment in post-hatching care is not population-specific  
259 (Ratz et al. 2016). Another explanation is that females consumed a larger part of their clutch  
260 in populations with the warmest compared to the coldest autumns. Filial egg consumption is a  
261 common phenomenon in insects (Elgar and Crespi 1992) and it has been recently reported in  
262 several Dermapteran species, such as the European earwig *F. auricularia* (Koch and Meunier  
263 2014) and the maritime earwig *Anisolabis maritima* Bonelli (Miller and Zink 2012). In the  
264 European earwig, this phenomenon has been proposed to reflect an adaptive strategy of  
265 females to limit weight loss during the period of egg care (i.e. when they stop all other  
266 foraging activities) and by doing so, to reallocate their resources into post-hatching care  
267 and/or into a 2<sup>nd</sup> oogenesis cycle (Koch and Meunier 2014; Tourneur 2018). Given that

268 females lay eggs earlier in populations with the warmest autumns, this increased egg  
269 consumption could be an adaptive strategy to limit the cost of tending newly hatched  
270 offspring earlier in the season (middle of winter) when food sources are scarce or absent. If  
271 this hypothesis holds true, it would suggest that filial egg cannibalism could be a strategy that  
272 *F. auricularia* females have evolved to better cope with thermal constraints and therefore to  
273 successfully establish in populations exhibiting warm autumns and/or requiring very long  
274 period of parental egg care.

275 We found that the longevity of both males and females were associated with the  
276 thermal regime of the population of origin. In particular, female and male longevity  
277 decreased together with warm summers (and cold Februaries), while male longevity also  
278 decreased with warm autumns (and cold springs). The first results may be a by-product of the  
279 effect of temperature on the date of egg laying and/or egg hatching. In particular, we showed  
280 that females from populations facing warm summers are the first to lay their eggs. Individuals  
281 from these populations might thus have been the oldest at the date of our field sampling,  
282 therefore leading to the shortest longevity in our subsequent experiment. Surprisingly, there  
283 was a sex-specific effect of spring (and autumn) temperatures on adult longevity: males lived  
284 up to two times longer in populations with warm compared to cold springs (as well as cold  
285 compared to warm autumns), whereas this effect was absent in females. This finding may  
286 reflect sex-specific sensitivity to high temperatures in terms of, for instance, physiology or  
287 expression of costly behaviors. Whereas some physiological traits are known to be sex-  
288 specific in this species (Kohlmeier et al. 2016; Vogelweith et al. 2017), further studies should  
289 explore the effects of temperature on the observed differences. Notwithstanding its  
290 underlying mechanisms, the high longevity of males in warm spring populations opens scope  
291 for these males to mate with females of the subsequent generation, as well as for an  
292 involvement of fathers into larva care. These two processes remain unknown in this species,

293 but they could be of central importance in their successful adaptation to novel environments.  
294 Follow-up studies will thus investigate the (re)mating strategies of earwig males, as well as  
295 the expression of paternal care across these populations.

296 To conclude, our results demonstrate that the spread of the European earwigs across  
297 North America came with important changes in their life-history traits and life cycle, and that  
298 these changes emerged in a bit less than a century and thus less than a hundred generations.  
299 Whereas we show that some of these changes are by-products of novel thermal constraints  
300 (timing of first reproduction and female iteroparity), we reveal that others are likely to reflect  
301 adaptive strategies to cope with different autumn temperatures (egg production and egg  
302 cannibalism). Overall, these findings demonstrate that even if temperature can be an  
303 important constraint in the life-cycle of the European earwig (Lamb and Wellington 1974;  
304 Moerkens et al. 2012; Körner et al. 2018; Hill et al. 2019), it cannot be considered as a long-  
305 term constraint for its successful invasion in novel environments. Our findings also  
306 emphasize that adaptation does not necessarily operate in response to overall mean  
307 temperatures of the invaded populations, but to their thermal regimes – i.e. to seasonality  
308 and/or mean temperature at specific time of their life-cycle. Whether the reported thermal  
309 adaptations are the product of population-differences in the early-life experience of the tested  
310 adults (Wong and Kölliker 2014; English et al. 2016), and/or the product of an inherited  
311 genetic basis that varies with thermal regimes (possibly due to an ancestral phenotypic  
312 plasticity to thermal regimes; Levis and Pfennig 2016; Corl et al. 2018; Fox et al. 2019), as  
313 well as whether these adaptations are similar across the multiple zones of invasions  
314 worldwide (Frank 1918; Guillet et al. 2000; Quarrell et al. 2018; Hill et al. 2019) will be  
315 investigated in future studies. On a more general level, our results emphasize that predicting  
316 the spread of a biological invasion cannot only rely on presence/absence data at a given time,  
317 but needs considering the adaptive capability of this species to novel environmental

318 constraints. This would require collecting data sets exploring such a capability across many  
319 species and taxa, a difficult task for which contributes the present study.

### **AUTHOR CONTRIBUTION STATEMENT**

320 JCT designed the experiment, conducted field samplings, and run the experiments. JM  
321 analysed the data and wrote the first version of the manuscript. The final manuscript was  
322 commented and corrected by all authors.

### **ACKNOWLEDGMENTS**

323 This work is dedicated to the memory of Noelle Tourneur, for her constant support through  
324 JCT career. We thank Maximilian Körner and Franck Dedeine for their comments on this  
325 manuscript. We also would like to thank Jean Gingras for his help during laboratory  
326 observations and samplings, as well as Michel Vancassel and Maryvonne Forasté for their  
327 help in the late 1980s.

### **REFERENCES**

328 Albouy V, Caussanel C (1990) Dermaptères ou perce-oreilles. Fédération Française des  
329 Sociétés de Sciences Naturelles, Paris

330 Bellard C, Leroy B, Thuiller W, et al (2016) Major drivers of invasion risks throughout the  
331 world. *Ecosphere* 7:1–14. doi: 10.1002/ecs2.1241

332 Benjamini Y, Hochberg Y (1995) Benjamini Y, Hochberg Y. Controlling the false discovery  
333 rate: a practical and powerful approach to multiple testing. *J R Stat Soc B* 57:289–300.  
334 doi: 10.2307/2346101

- 335 Boos S, Meunier J, Pichon S, Kölliker M (2014) Maternal care provides antifungal protection  
336 to eggs in the European earwig. *Behav Ecol* 25:754–761. doi: 10.1093/beheco/aru046
- 337 Bradshaw CJA, Leroy B, Bellard C, et al (2016) Massive yet grossly underestimated global  
338 costs of invasive insects. *Nat Commun*. doi: 10.1038/ncomms12986
- 339 Cantrall IJ (1972) *Forficula auricularia* L. (Dermap.: Forfic.) in Michigan. *Gt Lakes Entomol*  
340 5:107.
- 341 Corl A, Bi K, Luke C, et al (2018) The Genetic Basis of Adaptation following Plastic  
342 Changes in Coloration in a Novel Environment. *Curr Biol* 28:2970–2977.e7. doi:  
343 10.1016/j.cub.2018.06.075
- 344 Courchamp F, Fournier A, Bellard C, et al (2017) Invasion Biology: Specific Problems and  
345 Possible Solutions. *Trends Ecol Evol* 32:13–22. doi: 10.1016/j.tree.2016.11.001
- 346 Crumb SE, Eide PM, Bonn AE (1941) The European earwig. *United State Dep Agric Tech*  
347 *Bull* 766:76.
- 348 Diehl JM, Meunier J (2018) Surrounding pathogens shape maternal egg care but not egg  
349 production in the European earwig. *Behav Ecol* 29:128–136. doi:  
350 10.1093/beheco/arx140
- 351 Elgar MA, Crespi BJ (1992) *Cannibalism: ecology and evolution among diverse taxa*. Oxford  
352 University Press, Oxford
- 353 English S, Fawcett TW, Higginson AD, et al (2016) Adaptive Use of Information during  
354 Growth Can Explain Long-Term Effects of Early Life Experiences. *Am Nat* 187:620–  
355 632. doi: 10.1086/685644
- 356 Fox RJ, Donelson JM, Schunter C, et al (2019) Beyond buying time: the role of plasticity in  
357 phenotypic adaptation to rapid environmental change. *Philos Trans R Soc B Biol Sci*



- 358           374:20180174. doi: 10.1098/rstb.2018.0174
- 359   Frank LM (1918) Notes from tasmania. J Econ Ent 11:472–475.
- 360   Fulton BE (1924) The European earwig. Oregon Agric Exp Stn Bull 207:1–29.
- 361   Gingras J, Tourneur J-C (2001) Timing of adult mortality, oviposition, and hatching during  
362           the underground phase of *Forficula auricularia* (Dermaptera: Forficulidae). Can  
363           Entomol 133:269–278.
- 364   Guillet S, Josselin N, Vancassel M (2000) Multiple introductions of the *Forficula auricularia*  
365           species complex (Dermaptera: Forficulidae) in eastern North America. Can Entomol  
366           132:49–57. doi: 10.4039/Ent13249-1
- 367   Hill MP, Binns M, Umina PA, et al (2019) Climate, human influence and the distribution  
368           limits of the invasive European earwig, *Forficula auricularia* , in Australia. Pest Manag  
369           Sci 75:134–143. doi: 10.1002/ps.5192
- 370   Hill MP, Clusella-Trullas S, Terblanche JS, Richardson DM (2016) Drivers, impacts,  
371           mechanisms and adaptation in insect invasions. Biol Invasions 18:883–891. doi:  
372           10.1007/s10530-016-1088-3
- 373   Hulme PE (2009) Trade, transport and trouble: Managing invasive species pathways in an era  
374           of globalization. J Appl Ecol 46:10–18. doi: 10.1111/j.1365-2664.2008.01600.x
- 375   Jeschke JM, Strayer DL (2005) Invasion success of vertebrates in Europe and North America.  
376           PNAS 102:7198–7202.
- 377   Jones DW (1917) The European earwig and its control. United State Dep Agric Tech Bull  
378           566:12.
- 379   Koch LK, Meunier J (2014) Mother and offspring fitness in an insect with maternal care:  
380           phenotypic trade-offs between egg number, egg mass and egg care. BMC Evol Biol

- 381 14:125. doi: 10.1186/1471-2148-14-125
- 382 Kohlmeier P, Holländer K, Meunier J (2016) Survival after pathogen exposure in group-  
383 living insects: don't forget the stress of social isolation! J Evol Biol 29:1867–1872. doi:  
384 10.1111/jeb.12916
- 385 Kölliker M (2007) Benefits and costs of earwig (*Forficula auricularia*) family life. Behav  
386 Ecol Soc 61:1489–1497. doi: 10.1007/s00265-007-0381-7
- 387 Kölliker M, Boos S, Wong JWY, et al (2015) Parent-offspring conflict and the genetic trade-  
388 offs shaping parental investment. Nat Commun 6:6850. doi: 10.1038/ncomms7850
- 389 Körner M, Foitzik S, Meunier J (2018) Extended winters entail long-term costs for insect  
390 offspring reared in an overwinter burrow. J Therm Biol 74:116–122. doi:  
391 10.1016/j.jtherbio.2018.03.021
- 392 Kramer J, Thesing J, Meunier J (2015) Negative association between parental care and  
393 sibling cooperation in earwigs: a new perspective on the early evolution of family life? J  
394 Evol Biol 28:1299–1308. doi: 10.1111/jeb.12655
- 395 Lamb RJ (1976) Parental behavior in the dermaptera with special reference to *Forficula*  
396 *auricularia* (Dermaptera: Forficulidae). Can J Entomol 108:609–619.
- 397 Lamb RJ, Wellington WG (1975) Life history and population characteristics of the european  
398 earwig, *Forficula auricularia* (Dermaptera: forficulidae), at Vancouver, British columbia.  
399 Can J Entomol 107:819–824.
- 400 Lamb RJ, Wellington WG (1974) Techniques for studying the behavior and ecology of the  
401 european earwig, *Forficula auricularia* (Dermaptera: Forficulidae). Can J Entomol  
402 106:881–888.
- 403 Levis NA, Pfennig DW (2016) Evaluating “Plasticity-First” Evolution in Nature: Key

- 404 Criteria and Empirical Approaches. Trends Ecol Evol 31:563–574. doi:  
405 10.1016/j.tree.2016.03.012
- 406 Meunier J, Wong JWY, Gómez Y, et al (2012) One clutch or two clutches? Fitness correlates  
407 of coexisting alternative female life-histories in the European earwig. Evol Ecol 26:669–  
408 682. doi: 10.1007/s10682-011-9510-x
- 409 Miller JS, Zink AG (2012) Parental care trade-offs and the role of filial cannibalism in the  
410 maritime earwig, *Anisolabis maritima*. Anim Behav 83:1387–1394. doi:  
411 10.1016/j.anbehav.2012.03.006
- 412 Moerkens R, Leirs H, Peusens G, et al (2012) Natural and human causes of earwig mortality  
413 during winter: Temperature, parasitoids and soil tillage. J Appl Entomol 136:490–500.  
414 doi: 10.1111/j.1439-0418.2011.01676.x
- 415 Quarrell SR, Arabi J, Suwalski A, et al (2018) The invasion biology of the invasive earwig,  
416 *Forficula auricularia* in Australasian ecosystems. Biol Invasions 20:1553–1565. doi:  
417 10.1007/s10530-017-1646-3
- 418 Quarrell SR, Davies NW, Walker PW, et al (2016) Identification of the putative aggregation  
419 pheromone components emitted by the European earwig, *Forficula auricularia*.  
420 Chemoecology. doi: 10.1007/s00049-016-0216-y
- 421 Ratz T, Kramer J, Veuille M, Meunier J (2016) The population determines whether and how  
422 life-history traits vary between reproductive events in an insect with maternal care.  
423 Oecologia 182:443–452. doi: 10.1007/s00442-016-3685-3
- 424 Sandrin L, Meunier J, Raveh S, et al (2015) Multiple paternity and mating group size in the  
425 European earwig, *Forficula auricularia*. Ecol Entomol 40:159–166. doi:  
426 10.1111/een.12171
- 427 Singh S, Mishra G, Omkar (2018) Plasticity in reproductive output and development in

- 428 response to thermal variation in ladybird beetle, *Menochilus sexmaculatus*. J Therm Biol  
429 71:180–188. doi: 10.1016/j.jtherbio.2017.11.010
- 430 Thesing J, Kramer J, Koch LK, Meunier J (2015) Short-term benefits, but transgenerational  
431 costs of maternal loss in an insect with facultative maternal care. Proc R Soc B Biol Sci  
432 282:20151617. doi: 10.1098/rspb.2015.1617
- 433 Tourneur J-C (2017) Epigeal phase of the biological cycle of *Forficula auricularia* Linnaeus  
434 (Dermaptera: Forficulidae) in eastern Canada. Can Entomol 149:600–606. doi:  
435 10.4039/tce.2017.33
- 436 Tourneur J-C (2018) Factors affecting the egg-laying pattern of *Forficula auricularia*  
437 (Dermaptera: Forficulidae) in three climatologically different zones of North America.  
438 Can Entomol 150:511–519. doi: 10.4039/tce.2018.24
- 439 Treherne RC (1923) The European earwig in British Columbia. Proceeding Entomol Soc Br  
440 Columbia 17:161–163.
- 441 Van Meyel S, Devers S, Meunier J (2019) Love them all: mothers provide care to foreign  
442 eggs in the European earwig *Forficula auricularia*.
- 443 Vancassel M (1984) Plasticity and Adaptive Radiation of Dermapteran Parental Behavior:  
444 Results and Perspectives. Adv Study Behav 14:51–80. doi: 10.1016/S0065-  
445 3454(08)60299-5
- 446 Vancassel M, Foraste M (1980) Le comportement parental des Dermaptères. Reprod Nutr  
447 Dévelop 20:759–770.
- 448 Vancassel M, Foraste M, Strambi A, Strambi C (1984) Normal and experimentally induced  
449 changes in hormonal hemolymph titers during parental behavior of the earwig *Labidura*  
450 *riparia*. Gen Comp Endocrinol 56:444–456. doi: 10.1016/0016-6480(84)90087-X

- 451 Vogelweith F, Foitzik S, Meunier J (2017) Age, sex, mating status, but not social isolation  
452 interact to shape basal immunity in a group-living insect. *J Insect Physiol* 103:64–70.  
453 doi: 10.1016/j.jinsphys.2017.10.007
- 454 Walker KA, Jones TH, Fell RD (1993) Pheromonal basis of aggregation in european earwig,  
455 *Forficula auricularia* L. (Dermaptera: Forficulidae). *J Chem Ecol* 19:2029–2038.
- 456 Weiß C, Kramer J, Holländer K, Meunier J (2014) Influences of relatedness, food  
457 deprivation, and sex on adult behaviors in the group-living insect *Forficula auricularia*.  
458 *Ethology* 120:923–932. doi: 10.1111/eth.12261
- 459 Wilson WA (1971) Nematode occurrence in Ontario Earwigs (Nematoda: Dermaptera). *Can*  
460 *Entomol* 103:1045–1048.
- 461 Wirth T, Guellec R Le, Vancassel M, Veuille M (1998) Molecular and reproductive  
462 characterization of sibling species in the european earwig (*Forficula auricularia*).  
463 *Evolution* 52:260.
- 464 Wong JWY, Kölliker M (2014) Effects of food restriction across stages of juvenile and early  
465 adult development on body weight, survival and adult life history. *J Evol Biol* 27:2420–  
466 30. doi: 10.1111/jeb.12484
- 467

468 **Table 1 – Details of the 19 sampled populations.** The table shows the name and location of  
 469 each population, their GPS coordinates (Latitude, Longitude), samplings years, total number  
 470 of mating pair setup across years (N. pairs), and thermal regimes (defined as PC1, PC2 and  
 471 PC3).

| Populations    | Country | State (USA)/Province (CDN) | Latitude | Longitude | Samplings    | N. pairs | PC1   | PC2   | PC3   |
|----------------|---------|----------------------------|----------|-----------|--------------|----------|-------|-------|-------|
| Ashville       | USA     | North Carolina             | 35.612   | -82.566   | 1994-95      | 80       | 4.60  | 0.73  | 0.74  |
| Charlestown    | USA     | Rhode Island               | 41.383   | -71.642   | 1990         | 42       | 1.37  | 0.73  | -0.84 |
| Deschutes      | USA     | Oregon                     | 44.157   | -121.256  | 1990         | 17       | -1.54 | -2.32 | -0.27 |
| Enderby        | CDN     | British Columbia           | 50.551   | -119.14   | 1989-90      | 121      | -1.68 | -0.02 | 1.14  |
| Ennis lake     | USA     | Montana                    | 45.447   | -111.695  | 1990         | 36       | -2.86 | -0.36 | 0.02  |
| Kimberley      | CDN     | British Columbia           | 49.635   | -115.998  | 1990         | 94       | -5.27 | -0.95 | 0.73  |
| Kingston       | USA     | Rhode Island               | 41.486   | -71.531   | 1991         | 137      | 1.00  | 0.76  | -0.75 |
| Montreal       | CDN     | Quebec                     | 45.542   | -73.893   | 1988,1990-95 | 356      | -2.78 | 2.32  | -0.07 |
| Pointe Pelée   | CDN     | Ontario                    | 41.963   | -82.518   | 1992         | 47       | 1.25  | 2.31  | -0.37 |
| Revelstoke     | CDN     | British Columbia           | 50.998   | -118.196  | 1989-90      | 100      | -2.69 | -0.11 | 0.95  |
| Rocky knob     | USA     | Virginia                   | 36.832   | -80.345   | 1993-94      | 304      | 1.44  | -0.07 | 0.48  |
| Saluda         | USA     | North Carolina             | 35.198   | -82.353   | 1993-95      | 117      | 5.03  | 0.69  | 0.77  |
| Santa Cruz*    | USA     | California                 | 36.926   | -121.845  | 1991         | 130      | 5.04  | -4.50 | -0.57 |
| Selkirk        | CDN     | Ontario                    | 42.834   | -79.932   | 1992-94      | 233      | -0.69 | 1.35  | -0.67 |
| Selinsgrove    | USA     | Pennsylvania               | 40.832   | -76.872   | 1993-94      | 134      | 1.76  | 1.83  | 0.27  |
| Truro          | CDN     | Nova Scotia                | 45.372   | -63.264   | 1988         | 39       | -3.46 | -0.13 | -1.42 |
| Vancouver      | CDN     | British Columbia           | 49.252   | -123.24   | 1989,1991    | 84       | 0.23  | -2.89 | -0.05 |
| Waterrock knob | USA     | North Carolina             | 35.464   | -83.138   | 1991-94      | 167      | -1.88 | -1.69 | 0.22  |
| Wheatley       | CDN     | Ontario                    | 42.094   | -82.445   | 1992         | 52       | 1.13  | 2.31  | -0.31 |

472 \* This population was called San Francisco in (Tourneur 2018).

473

474 **Table 2 – Loadings of the four first principal components (PCs) reflecting combinations**  
475 **of the 12 mean monthly temperatures across populations.** The traits having significant  
476 loadings on each PC are in bold.

|                                   | PC1          | PC2           | PC3           | PC4           |
|-----------------------------------|--------------|---------------|---------------|---------------|
| Jan                               | <b>0.800</b> | -0.589        | -0.066        | 0.083         |
| Feb                               | 0.716        | <b>-0.668</b> | 0.131         | 0.139         |
| Mar                               | <b>0.844</b> | -0.486        | 0.216         | 0.048         |
| Apr                               | <b>0.949</b> | -0.140        | <b>0.267</b>  | -0.082        |
| May                               | <b>0.890</b> | 0.321         | <b>0.286</b>  | <b>-0.145</b> |
| Jun                               | 0.731        | <b>0.665</b>  | 0.123         | -0.060        |
| Jul                               | 0.547        | <b>0.823</b>  | -0.006        | <b>0.143</b>  |
| Aug                               | 0.641        | <b>0.746</b>  | -0.013        | <b>0.175</b>  |
| Sep                               | <b>0.905</b> | 0.380         | -0.175        | -0.019        |
| Oct                               | <b>0.951</b> | 0.019         | <b>-0.292</b> | -0.064        |
| Nov                               | <b>0.931</b> | -0.174        | <b>-0.296</b> | -0.112        |
| Dec                               | <b>0.872</b> | -0.469        | -0.113        | 0.041         |
| Variance explained (%)            | <b>67.9</b>  | 26.9          | 3.8           | 1.1           |
| Cumulative variance explained (%) | 67.9         | 94.8          | 98.6          | 99.7          |

477

478 **Table 3 –Results of the statistical models on the 13 measured life-history traits.** PC1 positively reflects the overall mean temperature of a  
 479 population. High values of PC2 reflect populations with cold February (winter) and warm summer, and vice-versa. High values of PC3 reflect  
 480 populations with warm spring and cold autumn, and vice-versa. P-values significant after FDR correction (adj-P) are in bold. Model estimates

|                              | PC1    |      |       |       | PC2    |      |       |              | PC3    |       |       |              |
|------------------------------|--------|------|-------|-------|--------|------|-------|--------------|--------|-------|-------|--------------|
|                              | estim. | SE   | P     | adj-P | estim. | SE   | P     | adj-P        | estim. | SE    | P     | adj-P        |
| <b>First clutch</b>          |        |      |       |       |        |      |       |              |        |       |       |              |
| Egg laying date              | -1.55  | 1.47 | 0.307 | 0.665 | -8.92  | 2.34 | 0.002 | <b>0.011</b> | 20.37  | 6.23  | 0.005 | <b>0.014</b> |
| Egg number                   | -0.32  | 0.82 | 0.705 | 0.896 | 1.87   | 1.30 | 0.171 | 0.234        | -11.77 | 3.47  | 0.004 | <b>0.014</b> |
| Egg development time         | -0.31  | 0.53 | 0.575 | 0.896 | 2.16   | 0.85 | 0.022 | <b>0.041</b> | -4.57  | 2.26  | 0.061 | 0.132        |
| Larvae number                | -1.28  | 0.72 | 0.098 | 0.425 | 1.53   | 1.08 | 0.180 | 0.234        | -3.85  | 3.39  | 0.275 | 0.357        |
| <b>Second clutch</b>         |        |      |       |       |        |      |       |              |        |       |       |              |
| Egg laying date              | 0.79   | 2.01 | 0.700 | 0.896 | -3.28  | 3.26 | 0.331 | 0.391        | 13.13  | 8.46  | 0.143 | 0.233        |
| Egg number                   | 0.08   | 0.44 | 0.855 | 0.896 | -1.97  | 0.72 | 0.016 | <b>0.041</b> | 0.27   | 1.86  | 0.887 | 0.887        |
| Egg development time         | 1.92   | 0.92 | 0.059 | 0.381 | 3.93   | 1.48 | 0.021 | <b>0.041</b> | -19.02 | 4.04  | 0.001 | <b>0.005</b> |
| Larvae number                | -0.05  | 0.38 | 0.896 | 0.896 | -1.70  | 0.59 | 0.012 | <b>0.041</b> | 2.96   | 1.78  | 0.121 | 0.224        |
| <b>General</b>               |        |      |       |       |        |      |       |              |        |       |       |              |
| Total egg number             | 0.17   | 1.01 | 0.866 | 0.896 | -0.15  | 1.60 | 0.929 | 0.929        | -13.93 | 4.26  | 0.005 | <b>0.014</b> |
| Total larvae number          | -1.04  | 0.77 | 0.198 | 0.642 | 0.60   | 1.16 | 0.615 | 0.666        | -3.45  | 3.61  | 0.355 | 0.419        |
| Ratio of iteroparous females | 0.01   | 0.09 | 0.896 | 0.896 | -0.35  | 0.13 | 0.022 | <b>0.041</b> | -0.48  | 0.40  | 0.254 | 0.357        |
| Male longevity               | -10.26 | 3.63 | 0.013 | 0.165 | -23.93 | 5.77 | 0.001 | <b>0.011</b> | 65.49  | 15.39 | 0.001 | <b>0.005</b> |
| Female longevity             | -4.30  | 3.74 | 0.268 | 0.665 | -14.80 | 5.94 | 0.025 | <b>0.041</b> | 13.63  | 15.86 | 0.404 | 0.437        |

481 (estim).





483 **Figure 1 – Map showing the 19 sampled populations across Canada (CND) and United**  
484 **States of America (USA).** \* This population was called San Francisco in Tourneur (2018).

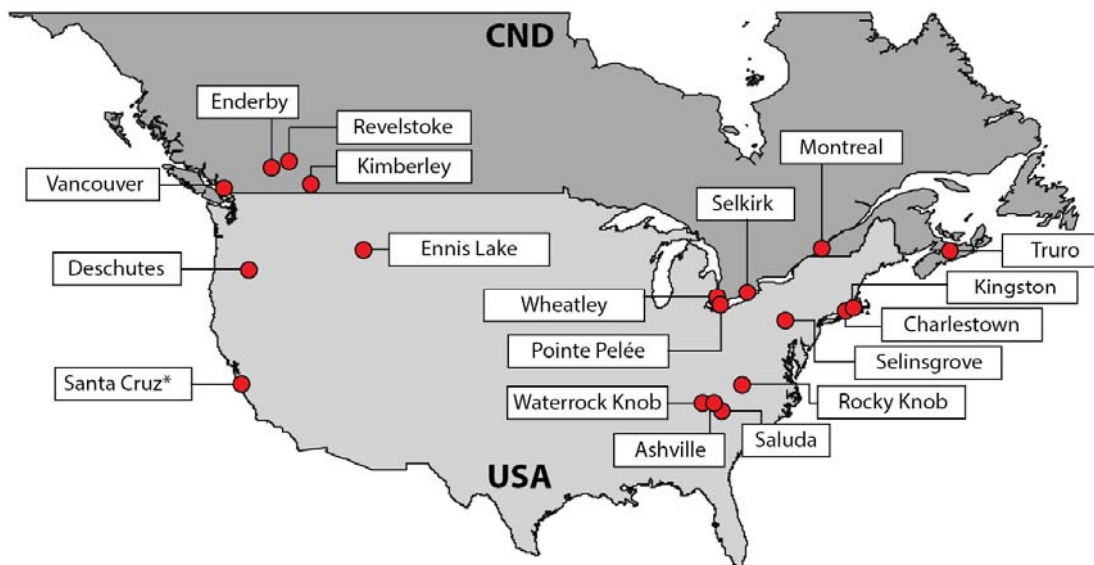

485  
486

487 **Figure 2** – Associations between the thermal regimes (PC1, PC2, PC3) of the 19 populations  
488 of origin and 1<sup>st</sup> clutch parameters. The red lines represent correlations that are significant  
489 after FDR correction. Mean values  $\pm$  SE. Egg laying date was calculated using October 1<sup>st</sup> as  
490 a reference (i.e. as day 0).

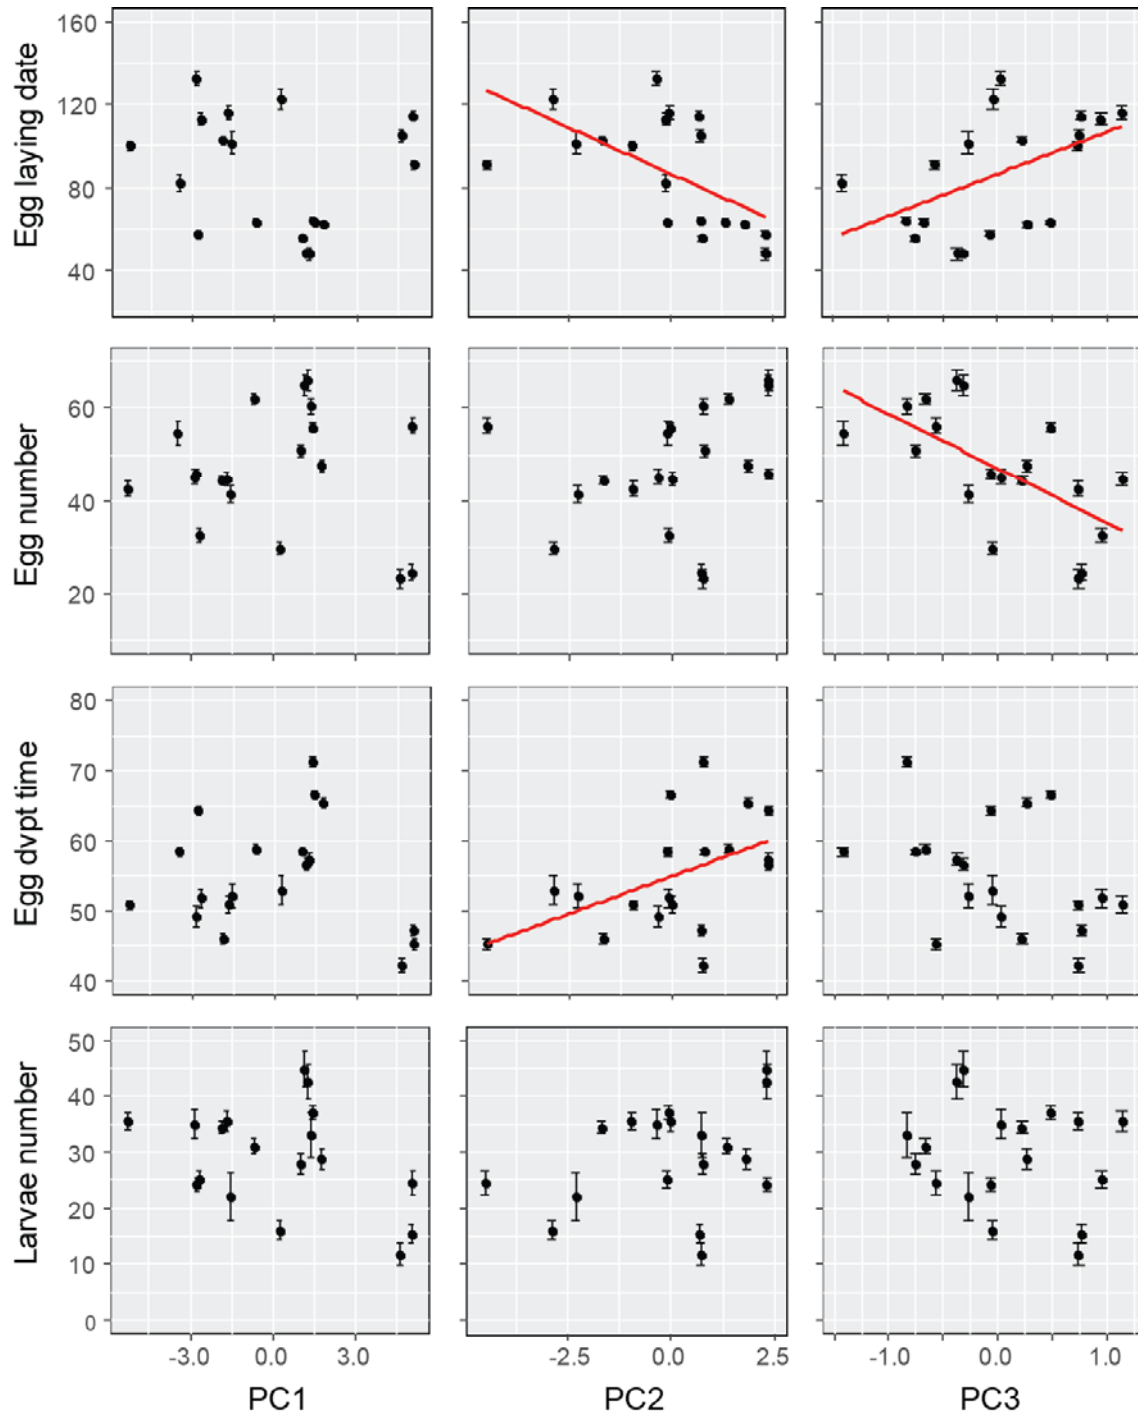

491  
492

493 **Figure 3** – Associations between the thermal regimes (PC1, PC2, PC3) of the 19 populations  
494 of origin and 2<sup>nd</sup> clutch parameters (when produced). The red lines represent correlations that  
495 are significant after FDR correction. Mean values  $\pm$  SE. Egg laying date was calculated using  
496 October 1<sup>st</sup> as a reference (i.e. as day 0).

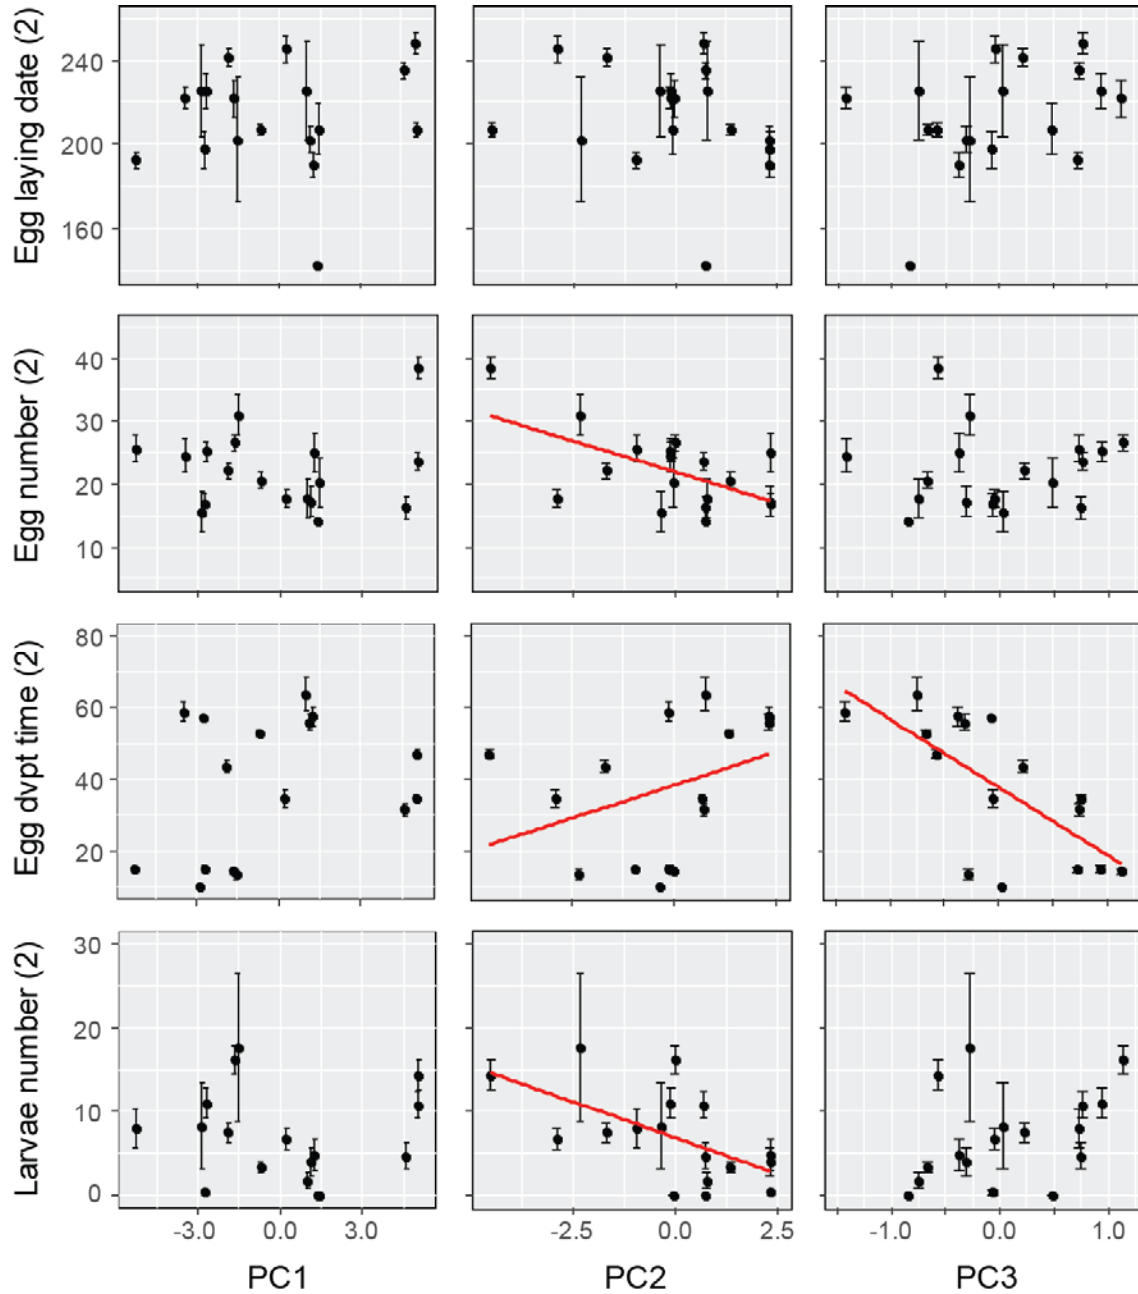

497  
498

499 **Figure 4** – Associations between the thermal regimes (PC1, PC2, PC3) of the 19 populations  
500 of origin and females' reproductive strategies and outcomes, as well as adult's longevity. The  
501 red lines represent correlations that are significant after FDR correction. Mean values  $\pm$  SE.

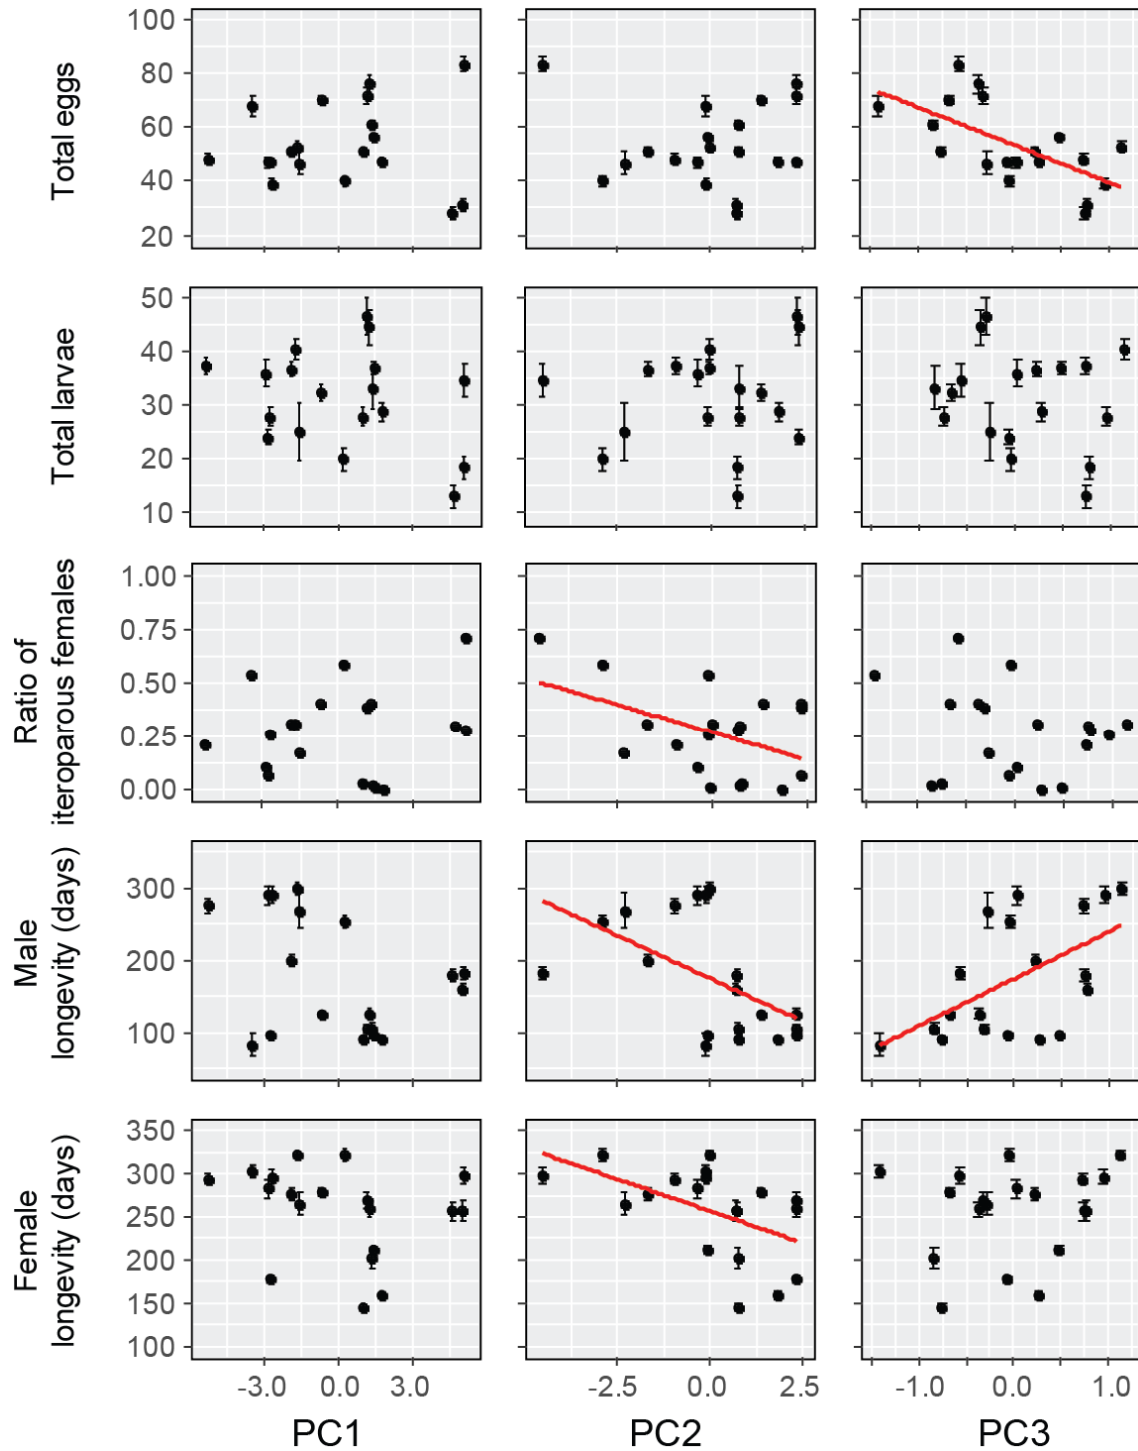

502
